# Supplementary material for: MicroRNA-532-5p protects against cerebral ischemia-reperfusion injury by directly targeting CXCL1
Source: publisher site journal article supplement (doi:10.18632/aging.202846), 2021-04-18
Supplement: Supplementary file [file aging-v13i8-202846-supplementary-material-SD1.pdf]

**SUPPLEMENTARY FIGURE**

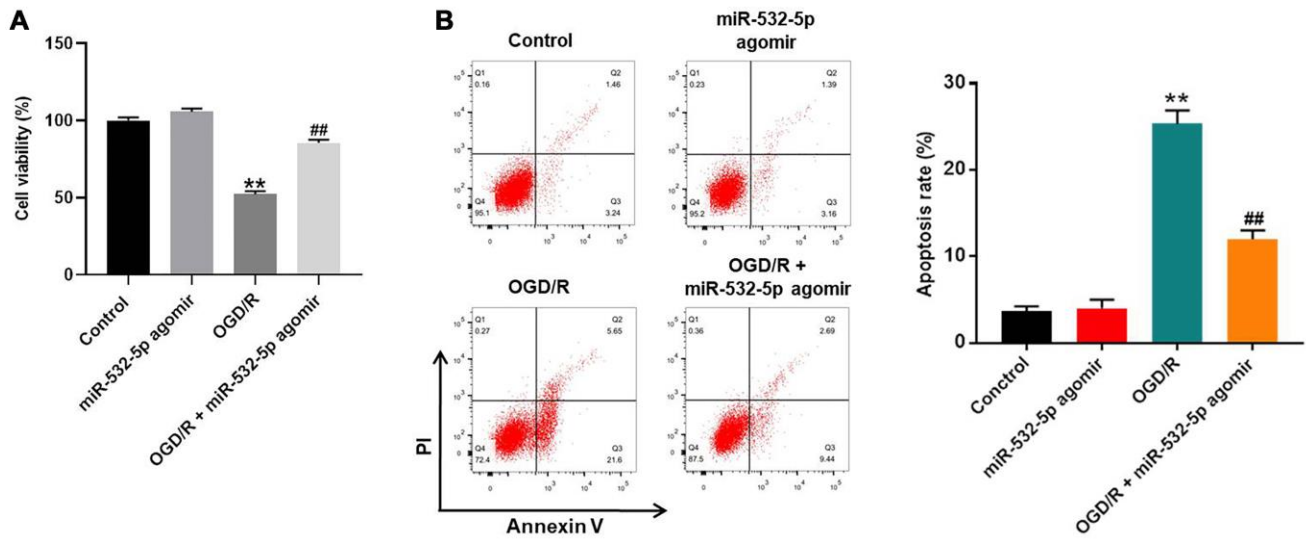

**Supplementary Figure 1. OGD/R-induced PC-12 cell growth inhibition was reversed by miR-532-5p agomir.** (A) PC-12 cells were treated with miR-532-5p agomir, OGD/R or OGD/R plus miR-532-5p. Then, the viability of PC-12 cells was tested by CCK-8 assay. (B) The apoptosis of PC-12 cells was tested by flow cytometry. \*\* $P < 0.01$  compared to Control; ## $P < 0.01$  compared to OGD/R. All experiments were performed in triplicates.
